# Supplementary material for: Famine mortality and contributions to later-life type 2 diabetes at the population level: a synthesis of findings from Ukrainian, Dutch and Chinese famines
Source: PubMed Central journal article supplement — BMJ Glob Health. 2024 Aug 29;9(8):e015355. doi: 10.1136/bmjgh-2024-015355 (PMC11367352; doi:10.1136/bmjgh-2024-015355), 2024-08-29
Supplement: bmjgh-9-8-s001.pdf [file bmjgh-9-8-s001.pdf]

**Supplementary Table 1. Excess deaths caused by famines in the twentieth century**

| <b>Year</b> | <b>Region/country</b>  | <b>Excess mortality<br/>(1,000s) by Devereux<br/>2000<sup>1</sup></b> | <b>Excess mortality<br/>(1,000s) by alternative<br/>sources<sup>2-6</sup></b> |
|-------------|------------------------|-----------------------------------------------------------------------|-------------------------------------------------------------------------------|
| 1903-06     | Nigeria (Hausaland)    | 5                                                                     | 5                                                                             |
| 1906-07     | Tanzania (south)       | 37.5                                                                  | 37.5                                                                          |
| 1913-14     | West Africa (Sahel)    | 125                                                                   | 125                                                                           |
| 1914-18     | Poland                 |                                                                       | 300                                                                           |
| 1914-18     | Africa                 |                                                                       | 400                                                                           |
| 1914-19     | Austro-Hungary         |                                                                       | 300                                                                           |
| 1915-18     | Balkans                |                                                                       | 1000                                                                          |
| 1915-18     | Persia/Iran            |                                                                       | 500                                                                           |
| 1916-18     | Ottoman Empire         |                                                                       | 1,500-2,000                                                                   |
| 1916-19     | Germany                |                                                                       | 500                                                                           |
| 1917-19     | Tanzania (central)     | 30                                                                    | 30                                                                            |
| 1918        | Italy                  |                                                                       | 30                                                                            |
| 1918        | Finland                |                                                                       | 8                                                                             |
| 1920-21     | China (Gansu, Shaanxi) | 500                                                                   | 500                                                                           |
| 1921-22     | Soviet Union           | 9,000                                                                 | 8,000                                                                         |
| 1927        | China (northwest)      | 3,000-6,000                                                           | 3,000-6,000                                                                   |
| 1929        | China (Hunan)          | 2,000                                                                 | 2000                                                                          |
| 1932-33     | Soviet Union           | 7,000-8,000                                                           | 2,600-3,900                                                                   |
| 1936        | China                  |                                                                       | 1,000-5,000                                                                   |
| 1939-45     | Poland                 |                                                                       | 900                                                                           |
| 1939-45     | France                 |                                                                       | 100                                                                           |
| 1940-45     | Soviet Union           |                                                                       | 7,000-8,000                                                                   |
| 1943        | China (Henan)          | 5,000                                                                 | 5,000                                                                         |
| 1943        | India (Bengal)         | 2,100-3,000                                                           | 2500                                                                          |
| 1942-44     | Greece                 |                                                                       | 300                                                                           |
| 1942-45     | Java                   |                                                                       | 1900                                                                          |
| 1944-45     | Vietnam                |                                                                       | 1,000                                                                         |
| 1945-46     | Austria                |                                                                       | 100                                                                           |
| 1939-46     | Germany                |                                                                       | 200                                                                           |
| 1943-44     | Rwanda                 | 300                                                                   | 30                                                                            |
| 1944-45     | Netherlands            | 10                                                                    | 10-30                                                                         |
| 1946-47     | Soviet Union           | 2,000                                                                 | 1,000                                                                         |
| 1946-48     | Cape Verde             |                                                                       | 30                                                                            |
| 1957-58     | Ethiopia (Tigray)      | 100                                                                   | 397                                                                           |
| 1958-62     | China                  | 30,000-33,000                                                         | 30,000-33,000                                                                 |
| 1966        | Ethiopia (Wollo)       | 45-60                                                                 | 45-60                                                                         |
| 1967-70     | Nigeria (Biafra)       | 1000                                                                  | 50-1,000                                                                      |

|              |                          |                  |                  |
|--------------|--------------------------|------------------|------------------|
| 1969-74      | West Africa (Sahel)      | 101              | 101              |
| 1972-73      | India (Maharashtra)      | 130              | 130              |
| 1972-75      | Ethiopia (Wollo/ Tigray) | 200-500          | 200-500          |
| 1974-75      | Somalia                  | 20               | 20               |
| 1974         | Bangladesh               | 1500             | 500              |
| 1979         | Cambodia                 | 1,500-2,000      | 500-800          |
| 1980-81      | Uganda (Karamoja)        | 30               | 30               |
| 1982-85      | Mozambique               | 100              | 100              |
| 1983-85      | Ethiopia                 | 590-1,000        | 590-1,000        |
| 1984-85      | Sudan (Darfur/Kordofan)  | 250              | 100              |
| 1988         | Sudan (south)            | 250              | 250              |
| 1991-93      | Somalia                  | 300-500          | 300              |
| 1995-99      | North Korea              | 2,800-3,500      | 600-1,000        |
| 1998         | Sudan (Bahr el Ghazal)   | 70               | 70               |
| <b>Total</b> |                          | 70,000 to 80,000 | 81,000 to 92,000 |

**Supplementary Table 2. Excess Deaths and Exposed Births to the Ukrainian famine of 1932-33, the Dutch famine of 1944-45, and the Chinese famine of 1959-61**

| <b>First author and publication year</b> | <b>Excess deaths during the famine</b> | <b>Births exposed to the famine prenatally</b> | <b>Data source</b>                                                                | <b>Methods and assumptions</b>                                                                                                                                                                                    |
|------------------------------------------|----------------------------------------|------------------------------------------------|-----------------------------------------------------------------------------------|-------------------------------------------------------------------------------------------------------------------------------------------------------------------------------------------------------------------|
| <b>The Ukrainian famine of 1932-33</b>   |                                        |                                                |                                                                                   |                                                                                                                                                                                                                   |
| Vallin 2002 <sup>7</sup>                 | 4.6 million                            | NR                                             | Population census in 1926, 1939, and 1959                                         | Estimates were made through the reconstruction of annual demographic changes.                                                                                                                                     |
| Meslé 2008 <sup>8</sup>                  | 2.6 million                            | 0.6 million                                    | Life tables in 1926 and 1939                                                      | Estimates were made by applying the probabilities of survival if there had been no crisis affect.                                                                                                                 |
| Rudnytskyi 2015 <sup>9</sup>             | 3.9 million                            | 0.6 million                                    | Population census in 1926, 1927, and 1939                                         | Adjustments were made by correcting population data and adding migration data.                                                                                                                                    |
| <b>The Dutch famine of 1944-45</b>       |                                        |                                                |                                                                                   |                                                                                                                                                                                                                   |
| Banning 1946 <sup>10</sup>               | 10,000                                 | NR                                             | Death data in seven towns in seven towns in the western Netherlands               | The number of excess deaths was doubled by assuming the remaining towns would contribute to a similar number of famine deaths.                                                                                    |
| Burger 1948 <sup>11</sup>                | >10,000                                | NR                                             | Weekly data on the total number of deaths for Amsterdam, Rotterdam, and The Hague | The estimates were made by summarizing weekly data.                                                                                                                                                               |
| Stein 1975 <sup>12</sup>                 | NR                                     | 13,000                                         | Population birth records in the western Netherlands in the 1940s                  | The number of births exposed prenatally to the famine was documented in western Netherlands.                                                                                                                      |
| Trienekens 1985 <sup>13</sup>            | 16,000                                 | NR                                             | Amsterdam death rates in 1945                                                     | Trienekens assumed that the mortality pattern in Amsterdam would be similar to other places in the west.                                                                                                          |
| Ekamper 2017 <sup>6</sup>                | 20,000-30,000                          | NR                                             | National cause of death registry                                                  | The difference in difference methods has been applied.                                                                                                                                                            |
| <b>The Chinese famine of 1959-61</b>     |                                        |                                                |                                                                                   |                                                                                                                                                                                                                   |
| Aird 1982 <sup>14</sup>                  | Over 23 million                        | NR                                             | Population census in 1953 and 1964                                                | There were a 5-million decrease in population comparing 1961 to 1957 and an estimate of over 18 million population growth in 1958 and 1959, which led to an estimate of over 23 million excess deaths in 1960-61. |
| Jin 1993 <sup>15</sup>                   | Over 40 million                        | NR                                             | Population census (year not specified)                                            | Excess deaths was estimated by a formula: population size at the end of the year-(1+ birth rate-natural death rate)*population size at the                                                                        |

|                                 |              |               |                                                                                                |                                                                                                                     |
|---------------------------------|--------------|---------------|------------------------------------------------------------------------------------------------|---------------------------------------------------------------------------------------------------------------------|
|                                 |              |               |                                                                                                | end of the previous year+underreported population size.                                                             |
| Ashton et al. 1984 <sup>4</sup> | 30 million   | NR            | Population census in 1964; Statistical yearbook of China, 1983                                 | Excess deaths were estimated as the difference between estimated actual deaths and deaths in absence of the famine. |
| Peng 1987 <sup>16</sup>         | 23 million   | NR            | Local population census from provinces published in 1980s; Statistical yearbook of China, 1983 | Estimates of excess death were made for 14 provinces (14.2 million) and then extrapolated to the whole country.     |
| Cao 2005 <sup>17</sup>          | 32.5 million | 30-40 million | Population census in 1953 and 1964; local archives                                             | Local archives can be used to minimize bias in population census.                                                   |

Footnote: NR: Not reported

**Supplementary Figure 1. The cumulative number of original research articles on the Great Chinese Famine of 1959-61**

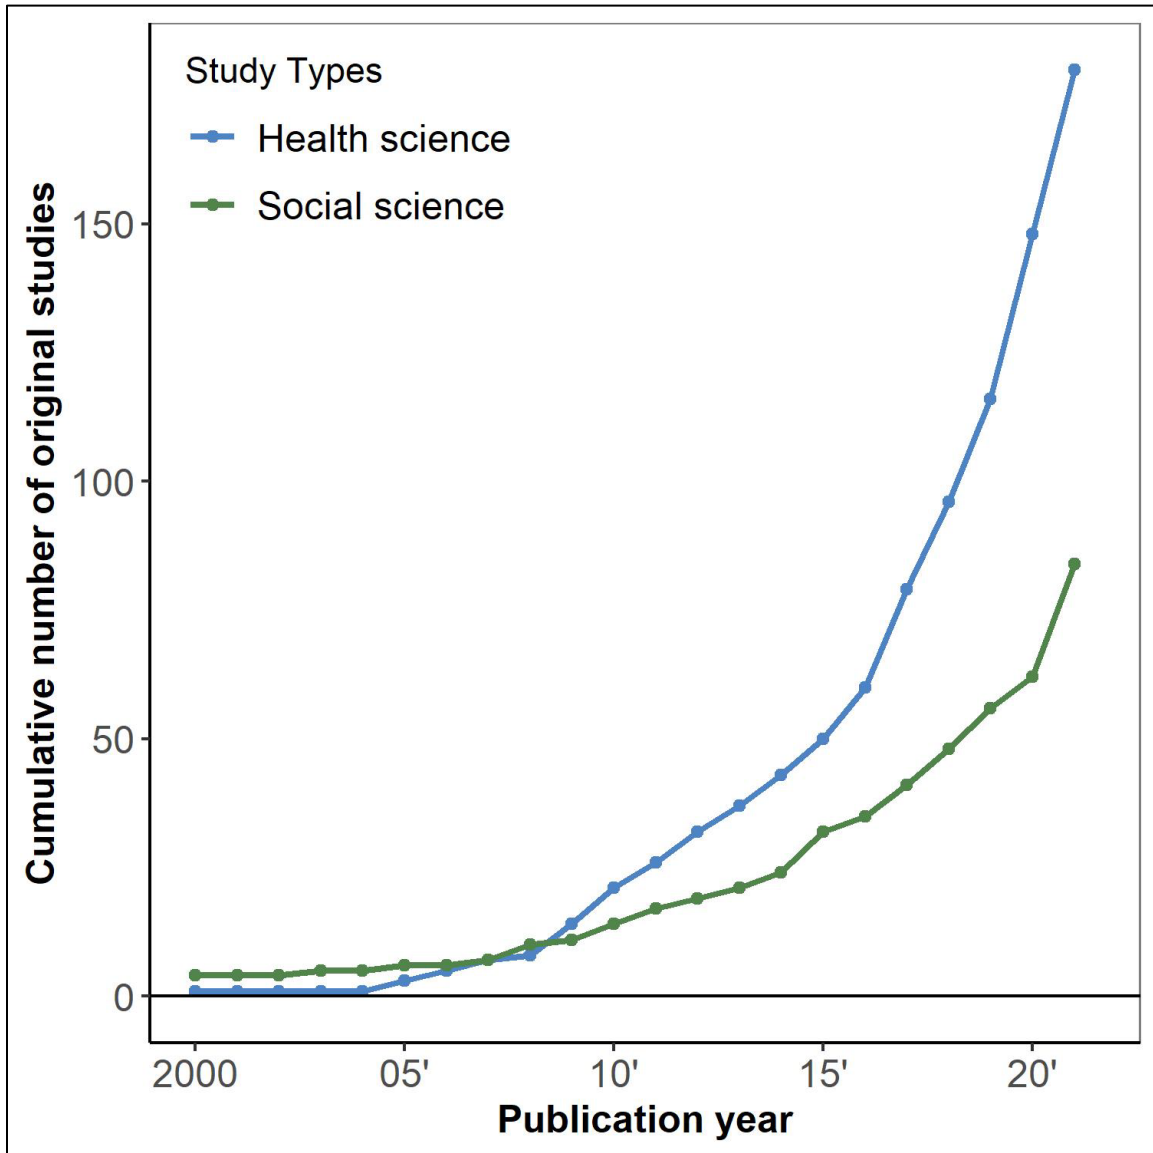

Footnote: Five electronic English- and Chinese-language databases were searched for Chinese famine studies on health outcomes from inception to September, 2022: PubMed, EMBASE, Web of Science, Wanfang Data, and the Chinese National Knowledge Infrastructure (CNKI). The following broad search terms in English and Chinese were used to identify related studies, including journal articles, degree theses, and conference manuscripts: (([China OR Chinese] AND (famine OR undernutrition OR starvation OR malnutrition)) OR great leap forward OR great famine). Studies meeting the following criteria were included: (a) the study was original research; (b) the Chinese famine of 1959–1961 was the exposure of interest; (c) clear information about the study design and results was provided. Comments, letters and reviews were not included. Review articles and reference lists were screened for additional relevant studies.

## References

1. Devereux S. Famine in the twentieth century. *IDS Working Paper* 2000; (105).
2. Ó Gráda C. Famine: a short history. New Jersey: Princeton University Press; 2009.
3. Ó Gráda C. The Hidden Victims: Civilian Casualties of the Two World Wars. New Jersey: Princeton University Press; 2024.
4. Ashton B, Hill K, Piazza A, Zeitz R. Famine in China, 1958-61. *Popul Dev Rev* 1984; 613-45.
5. Thibon C. Famine yesterday and today in Burundi. In: Dyson T, Ó Gráda C, eds. Famine demography: perspectives from the past and present: OUP Oxford; 2002.
6. Ekamper P, Bijwaard G, van Poppel F, Lumey LH. War-related excess mortality in The Netherlands, 1944-45: New estimates of famine- and non-famine-related deaths from national death records. *Hist Methods* 2017; **50**(2): 113-28.
7. Vallin J, Meslé F, Adamets S, Pyrozhev S. A new estimate of Ukrainian population losses during the crises of the 1930s and 1940s. *Popul Stud (Camb)* 2002; **56**(3): 249-63.
8. Meslé F, Vallin J, Andreev E. Demographic consequences of the great famine: then and now. *Harv Ukr Stud* 2008; **30**(1/4): 217-41.
9. Rudnytskyi O, Levchuk N, Wolowyna O, Shevchuk P, Kovbasiuk A. Demography of a man-made human catastrophe: The case of massive famine in Ukraine 1932-1933. *Can Stud Popul* 2015; **42**(1-2): 53-80.
10. Banning C. Food shortage and public health, first half of 1945. *Annals Am Acad Pol & Soc Sci* 1946; **245**(1): 93-110.
11. Burger GCE, Drummond JCS, H.R. Malnutrition and starvation in western Netherlands: September 1944-July 1945. General State Print Office. 1948.
12. Stein Z, Susser M, Saenger G, Marolla F. Famine and human development: The Dutch hunger winter of 1944-1945. New York, NY, US: Oxford University Press; 1975.
13. Trienekens GMT. Tussen ons volk en de honger: de voedselvoorziening, 1940-1945: Wageningen University and Research; 1985.
14. Aird JS. Population studies and population policy in China. *Popul Dev Rev* 1982: 267-97.
15. Jin H. Memorandum on the 'Three-year Natural Disaster' (in Chinese). *Society* 1993; (4-5): 13-22.
16. Peng X. Demographic consequences of the Great Leap Forward in China's provinces. *Popul Dev Rev* 1987: 639-70.
17. Cao S. The deaths of China's population and its root cause during 1959-1961 (in Chinese). *Popul Sci Chin* 2005; (1): 3.
